# Supplementary material for: (4Z)-Lachnophyllum Lactone, an Acetylenic Furanone from Conyza bonariensis, Identified for the First Time with Allelopathic Activity against Cuscuta campestris
Source: MDPI journal article supplement (doi:10.3390/agriculture12060790), 2022-05-30
Supplement: s1 [file s1]

Archive with 1 entries (1 files):
- agriculture-1703432-supplementary.pdf
