# Supplementary material for: (4Z)-Lachnophyllum Lactone, an Acetylenic Furanone from Conyza bonariensis, Identified for the First Time with Allelopathic Activity against Cuscuta campestris
Source: MDPI journal article supplement (doi:10.3390/agriculture12060790), 2022-05-30
Supplement: s1 [file s1 › agriculture-1703432-supplementary.pdf]

## Supporting Information

**(4Z)-lachnophyllum lactone, an acetylenic furanone from *Conyza bonariensis* identified for the first time with allelopathic activity against *Cuscuta campestris*.**

**Mónica Fernández-Aparicio,<sup>1,\*</sup> Gabriele Soriano,<sup>2</sup> Marco Masi,<sup>2,\*</sup> Pilar Carretero,<sup>3</sup> Susana Vilariño-Rodríguez,<sup>4</sup> Alessio Cimmino<sup>2</sup>**

<sup>1</sup>Institute for Sustainable Agriculture-CSIC, Avda. Menéndez Pidal sn, 14004 Córdoba, Spain

<sup>2</sup>Department of Chemical Sciences, University of Naples Federico II, Complesso Universitario Monte S. Angelo, Via Cintia, 80126 Naples, Italy

<sup>3</sup>University of Córdoba, Campus de Rabanales, Córdoba, E-14071

<sup>4</sup>ALGOSUR S.A., Ctra Lebrija-Trebujena km 5.5, Lebrija – Sevilla, Spain

\*Corresponding author: [monica.fernandez@ias.csic.es](mailto:monica.fernandez@ias.csic.es); [marco.masi@unina.it](mailto:marco.masi@unina.it)

### Supporting Information list

**Figure S1.** NOESY spectrum of (4Z)-lachnophyllum lactone recorded in CDCl<sub>3</sub> at 500 MHz

**Figure S2.** <sup>1</sup>H-NMR spectrum of (4Z)-lachnophyllum lactone recorded in CDCl<sub>3</sub> at 500 MHz.

**Figure S3.** <sup>13</sup>C-NMR spectrum of (4Z)-lachnophyllum lactone recorded in CDCl<sub>3</sub> at 125 MHz.

**Figure S4.** ESI MS spectrum of (4Z)-lachnophyllum lactone recorded in positive modality.

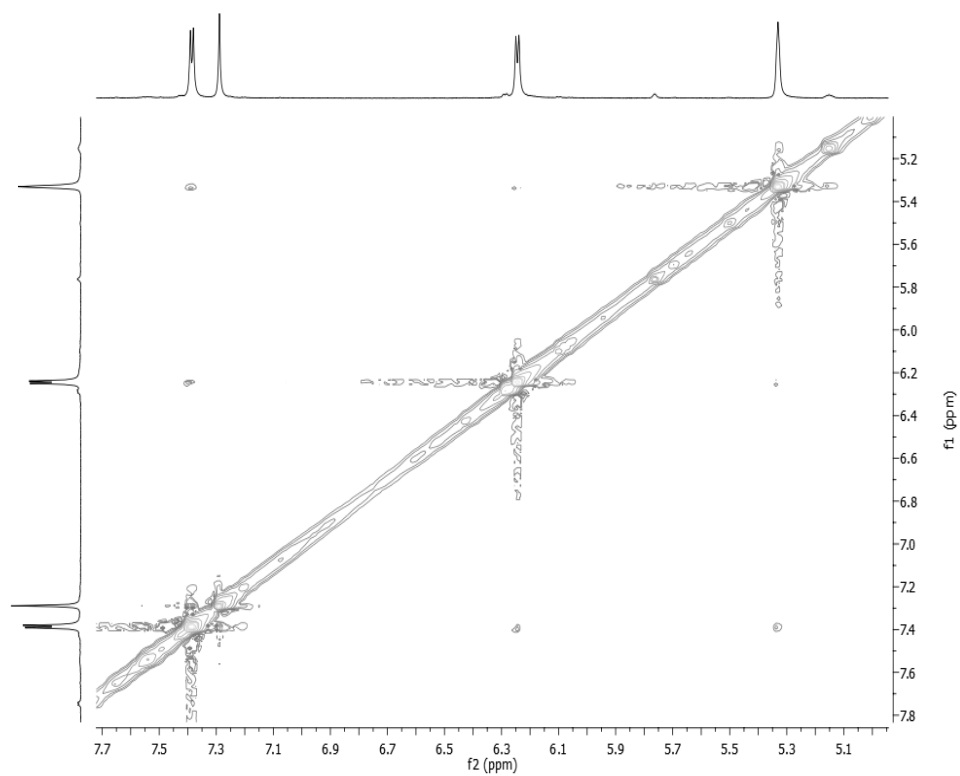

**Figure S1.** NOESY spectrum of (4Z)-lachnophyllum lactone recorded in CDCl<sub>3</sub> at 500 MHz.

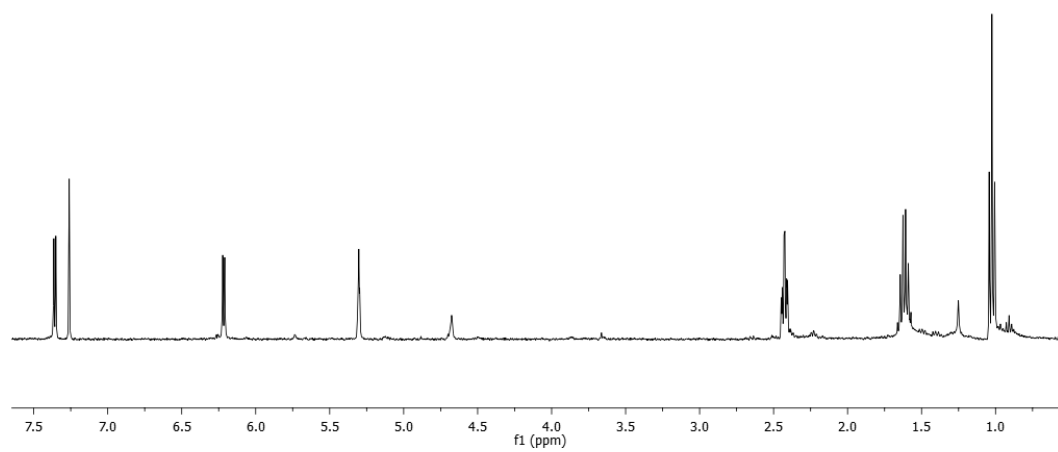

**Figure S2.** <sup>1</sup>H-NMR spectrum of (4Z)-lachnophyllum lactone recorded in CDCl<sub>3</sub> at 500 MHz.

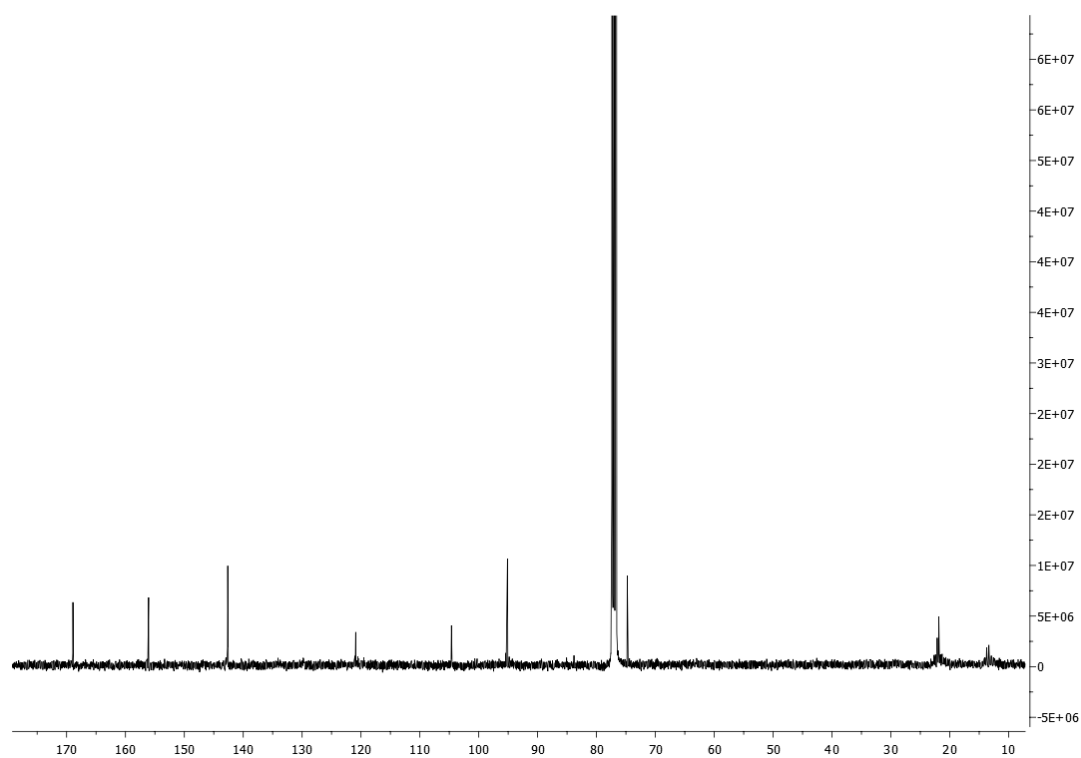

**Figure S3.**  $^{13}\text{C}$ -NMR spectrum of (4Z)-lachnophyllum lactone recorded in  $\text{CDCl}_3$  at 125 MHz.

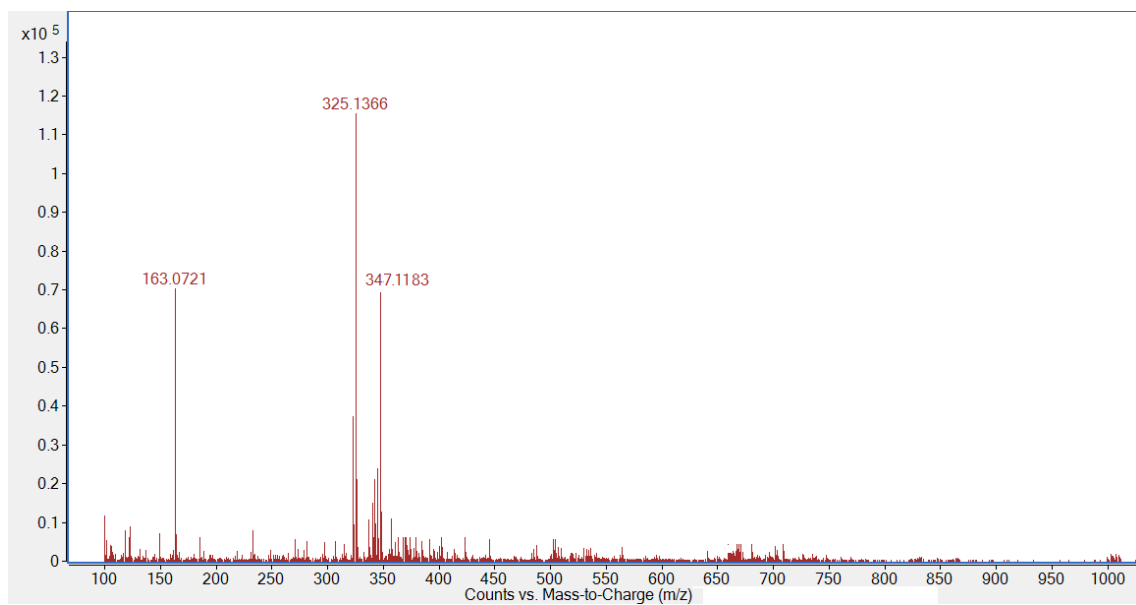

**Figure S4.** ESI MS spectrum of (4Z)-lachnophyllum lactone recorded in positive modality.
